# Supplementary material for: The seroprevalence of SARS‐CoV‐2‐specific antibodies in children, Australia, November 2020 – March 2021
Source: PubMed Central journal article supplement — Med J Aust. 2022 May 21;217(1):43–5. doi: 10.5694/mja2.51542 (PMC9348424; doi:10.5694/mja2.51542), 2022-05-21
Supplement: MJA2-217-43-s001.pdf [file MJA2-217-43-s001.pdf]

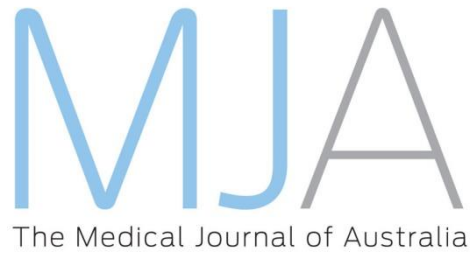

## **Supporting Information**

### **Supplementary results**

**This appendix was part of the submitted manuscript and has been peer reviewed.  
It is posted as supplied by the authors.**

Appendix to: Koirala A, Gidding HF, Vette K, Macartney K, on behalf of the PAEDS Serosurvey Group. The seroprevalence of SARS-CoV-2-specific antibodies in children, Australia, November 2020 – March 2021. *Med J Aust* 2022; doi: 10.5694/mja2.51542.

## Supplementary results

**Figure. Geographic classification of residential postcode of donors of serosurvey specimens (Accessibility Remoteness Index of Australia, ARIA)<sup>1</sup> and of total resident population, by state**

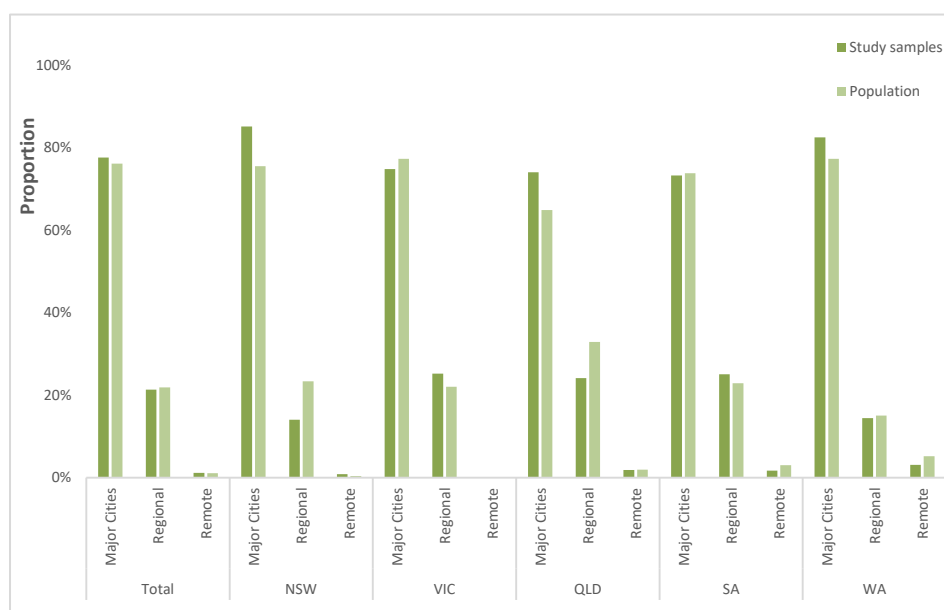

**Table. Socio-economic status of residential postcode of donors of serosurvey specimens (Socio-Economic Index for Areas, Index of Relative Socio-economic Disadvantage, IRSD)<sup>2</sup> and of total resident population, by quintile**

| IRSD quintile            | Number (proportion) |
|--------------------------|---------------------|
| First (least advantaged) | 340 (20.2%)         |
| Second                   | 267 (15.8%)         |
| Third                    | 378 (22.4%)         |
| Fourth                   | 331 (19.6%)         |
| Fifth (most advantaged)  | 366 (21.7%)         |
| Missing data             | 3 (0.2%)            |

## References

1. Australian Bureau of Statistics. Socio-Economic Indexes for Areas (SEIFA), 2016. Technical paper (Cat. no. 2033.0.55.001). Mar 2018. [https://www.ausstats.abs.gov.au/ausstats/subscriber.nsf/0/756EE3DBEFA869EFCA258259000BA746/\\$File/SEIFA%202016%20Technical%20Paper.pdf](https://www.ausstats.abs.gov.au/ausstats/subscriber.nsf/0/756EE3DBEFA869EFCA258259000BA746/$File/SEIFA%202016%20Technical%20Paper.pdf) (viewed June 2021).
2. Australian Bureau of Statistics. 1270.0.55.005. Australian Statistical Geography Standard (ASGS), volume 5: remoteness structure, July 2016. Updated 16 Mar 2018. <https://www.abs.gov.au/ausstats/abs@.nsf/mf/1270.0.55.005> (viewed June 2021).
